# Supplementary material
Source: PubMed Central journal article supplement (PMC10494392)
Supplement: NIHMS1920027-supplement-Supp_Fig_1.pdf [file NIHMS1920027-supplement-Supp_Fig_1.pdf]

**A**

**Nucleoside Reverse Transcriptase Inhibitors (NRTI)**

| Drug                | Mutations list | Score | Range | Color | Interpretation  |
|---------------------|----------------|-------|-------|-------|-----------------|
| Lamivudine (3TC)    |                | 0     | 1     | Green | S - Susceptible |
| Abacavir (ABC)      |                | 0     | 1     | Green | S - Susceptible |
| Zidovudine (AZT)    |                | 0     | 1     | Green | S - Susceptible |
| Stavudine (D4T)     |                | 0     | 1     | Green | S - Susceptible |
| Didanosine (DDI)    |                | 0     | 1     | Green | S - Susceptible |
| Emtricitabine (FTC) |                | 0     | 1     | Green | S - Susceptible |
| Tenofovir DF (TDF)  |                | 0     | 1     | Green | S - Susceptible |

**Non-Nucleoside Reverse transcriptase Inhibitors (NNRTI)**

| Drug                    | Mutations list | Score | Range | Color | Interpretation  |
|-------------------------|----------------|-------|-------|-------|-----------------|
| Efavirenz (EFV)         |                | 0     | 1     | Green | S - Susceptible |
| Etravirine TMC125 (ETR) |                | 0     | 1     | Green | S - Susceptible |
| Nevirapine (NVP)        |                | 0     | 1     | Green | S - Susceptible |
| Rilpivirine (RPV)       |                | 0     | 1     | Green | S - Susceptible |

**Protease Inhibitors (PI)**

| Drug                  | Mutations list | Score | Range | Color | Interpretation  |
|-----------------------|----------------|-------|-------|-------|-----------------|
| Atazanavir (ATV/r)    |                | 0     | 1     | Green | S - Susceptible |
| Darunavir (DRV/r)     |                | 0     | 1     | Green | S - Susceptible |
| Fosamprenavir (FPV/r) |                | 0     | 1     | Green | S - Susceptible |
| Indinavir (IDV/r)     |                | 0     | 1     | Green | S - Susceptible |
| Lopinavir (LPV/r)     |                | 0     | 1     | Green | S - Susceptible |
| Nelfinavir (NFV)      |                | 0     | 1     | Green | S - Susceptible |
| Saquinavir (SQV/r)    |                | 0     | 1     | Green | S - Susceptible |
| Tipranavir (TPV/r)    |                | 0     | 1     | Green | S - Susceptible |

**Integrase inhibitors (INI)**

| Drug                   | Mutations list | Score | Range | Color | Interpretation  |
|------------------------|----------------|-------|-------|-------|-----------------|
| Dolutegravir BID (DTG) |                | 0     | 1     | Green | S - Susceptible |
| Etravirine (EVG)       |                | 0     | 1     | Green | S - Susceptible |
| Raltegravir (RAL)      |                | 0     | 1     | Green | S - Susceptible |

ASI Drug Resistance Algorithm Stanford HIVDB 7.0.1

**B**

**Nucleoside Reverse Transcriptase Inhibitors (NRTI)**

| Drug                | Mutations List | Score | Range | Color | Interpretation |
|---------------------|----------------|-------|-------|-------|----------------|
| abacavir (ABC)      |                | 0     | 1     | Green | Susceptible    |
| zidovudine (AZT)    |                | 0     | 1     | Green | Susceptible    |
| stavudine (D4T)     |                | 0     | 1     | Green | Susceptible    |
| didanosine (DDI)    |                | 0     | 1     | Green | Susceptible    |
| emtricitabine (FTC) |                | 0     | 1     | Green | Susceptible    |
| lamivudine (3TC)    |                | 0     | 1     | Green | Susceptible    |
| tenofovir (TDF)     |                | 0     | 1     | Green | Susceptible    |

**Non Nucleoside Reverse Transcriptase Inhibitors (NNRTI)**

| Drug              | Mutations List | Score | Range | Color | Interpretation |
|-------------------|----------------|-------|-------|-------|----------------|
| doravirine (DOR)  |                | 0     | 1     | Green | Susceptible    |
| efavirenz (EFV)   |                | 0     | 1     | Green | Susceptible    |
| etravirine (ETR)  |                | 0     | 1     | Green | Susceptible    |
| nevirapine (NVP)  |                | 0     | 1     | Green | Susceptible    |
| rilpivirine (RPV) |                | 0     | 1     | Green | Susceptible    |

**Protease Inhibitors (PI)**

| Drug                  | Mutations List | Score | Range | Color | Interpretation |
|-----------------------|----------------|-------|-------|-------|----------------|
| atazanavir (ATV/r)    |                | 0     | 1     | Green | Susceptible    |
| darunavir (DRV/r)     |                | 0     | 1     | Green | Susceptible    |
| fosamprenavir (FPV/r) |                | 0     | 1     | Green | Susceptible    |
| indinavir (IDV/r)     |                | 0     | 1     | Green | Susceptible    |
| lopinavir (LPV/r)     |                | 0     | 1     | Green | Susceptible    |
| nelfinavir (NFV)      |                | 0     | 1     | Green | Susceptible    |
| saquinavir (SQV/r)    |                | 0     | 1     | Green | Susceptible    |
| tipranavir (TPV/r)    |                | 0     | 1     | Green | Susceptible    |

**Integrase Inhibitors (INI)**

| Drug               | Mutations List | Score | Range | Color | Interpretation |
|--------------------|----------------|-------|-------|-------|----------------|
| bictegravir (BIC)  |                | 0     | 1     | Green | Susceptible    |
| dolutegravir (DTG) |                | 0     | 1     | Green | Susceptible    |
| etravirine (EVG)   |                | 0     | 1     | Green | Susceptible    |
| raltegravir (RAL)  |                | 0     | 1     | Green | Susceptible    |

Drug resistance algorithm: STANFORD (8.8)

**C**

**Nucleoside Reverse Transcriptase Inhibitors (NRTI)**

| Drug                | Mutations list | Score | Range | Color  | Interpretation                 |
|---------------------|----------------|-------|-------|--------|--------------------------------|
| lamivudine (3TC)    | M184I          | 60    | 5     | Red    | High-level resistance          |
| abacavir (ABC)      | M184I          | 15    | 3     | Yellow | Low-level resistance           |
| zidovudine (AZT)    | M184I          | -10   | 1     | Green  | Susceptible                    |
| stavudine (D4T)     | M184I          | -10   | 1     | Green  | Susceptible                    |
| didanosine (DDI)    | M184I          | 10    | 2     | Yellow | Potential low-level resistance |
| emtricitabine (FTC) | M184I          | 60    | 5     | Red    | High-level resistance          |
| tenofovir (TDF)     | M184I          | -10   | 1     | Green  | Susceptible                    |

**Non-Nucleoside Reverse Transcriptase Inhibitors (NNRTI)**

| Drug              | Mutations list | Score | Range | Color | Interpretation |
|-------------------|----------------|-------|-------|-------|----------------|
| efavirenz (EFV)   |                | 0     | 1     | Green | Susceptible    |
| etravirine (ETR)  |                | 0     | 1     | Green | Susceptible    |
| nevirapine (NVP)  |                | 0     | 1     | Green | Susceptible    |
| rilpivirine (RPV) | M184I          | 0     | 1     | Green | Susceptible    |

**Protease Inhibitors (PI)**

| Drug                  | Mutations list | Score | Range | Color | Interpretation |
|-----------------------|----------------|-------|-------|-------|----------------|
| atazanavir (ATV/r)    |                | 0     | 1     | Green | Susceptible    |
| darunavir (DRV/r)     |                | 0     | 1     | Green | Susceptible    |
| fosamprenavir (FPV/r) |                | 0     | 1     | Green | Susceptible    |
| indinavir (IDV/r)     |                | 0     | 1     | Green | Susceptible    |
| lopinavir (LPV/r)     |                | 0     | 1     | Green | Susceptible    |
| nelfinavir (NFV)      |                | 0     | 1     | Green | Susceptible    |
| saquinavir (SQV/r)    |                | 0     | 1     | Green | Susceptible    |
| tipranavir (TPV/r)    |                | 0     | 1     | Green | Susceptible    |

**Integrase Inhibitors (INI)**

| Drug               | Mutations list | Score | Range | Color  | Interpretation                 |
|--------------------|----------------|-------|-------|--------|--------------------------------|
| dolutegravir (DTG) | E92Q           | 10    | 2     | Yellow | Potential low-level resistance |
| etravirine (EVG)   | E92Q           | 60    | 5     | Red    | High-level resistance          |
| raltegravir (RAL)  | E92Q           | 30    | 4     | Orange | Intermediate resistance        |

Drug resistance algorithm: STANFORD (8.2)

**D**

**Nucleoside Reverse Transcriptase Inhibitors (NRTI)**

| Drug                | Mutations list | Score | Range | Color  | Interpretation                 |
|---------------------|----------------|-------|-------|--------|--------------------------------|
| lamivudine (3TC)    | M184V          | 60    | 5     | Red    | High-level resistance          |
| abacavir (ABC)      | M184V          | 15    | 3     | Yellow | Low-level resistance           |
| zidovudine (AZT)    | M184V          | -10   | 1     | Green  | Susceptible                    |
| stavudine (D4T)     | M184V          | -10   | 1     | Green  | Susceptible                    |
| didanosine (DDI)    | M184V          | 10    | 2     | Yellow | Potential low-level resistance |
| emtricitabine (FTC) | M184V          | 60    | 5     | Red    | High-level resistance          |
| tenofovir (TDF)     | M184V          | -10   | 1     | Green  | Susceptible                    |

**Non-Nucleoside Reverse Transcriptase Inhibitors (NNRTI)**

| Drug              | Mutations list | Score | Range | Color | Interpretation |
|-------------------|----------------|-------|-------|-------|----------------|
| efavirenz (EFV)   |                | 0     | 1     | Green | Susceptible    |
| etravirine (ETR)  |                | 0     | 1     | Green | Susceptible    |
| nevirapine (NVP)  |                | 0     | 1     | Green | Susceptible    |
| rilpivirine (RPV) | M184V          | 0     | 1     | Green | Susceptible    |

**Protease Inhibitors (PI)**

| Drug                  | Mutations list | Score | Range | Color | Interpretation |
|-----------------------|----------------|-------|-------|-------|----------------|
| atazanavir (ATV/r)    |                | 0     | 1     | Green | Susceptible    |
| darunavir (DRV/r)     |                | 0     | 1     | Green | Susceptible    |
| fosamprenavir (FPV/r) |                | 0     | 1     | Green | Susceptible    |
| indinavir (IDV/r)     |                | 0     | 1     | Green | Susceptible    |
| lopinavir (LPV/r)     |                | 0     | 1     | Green | Susceptible    |
| nelfinavir (NFV)      |                | 0     | 1     | Green | Susceptible    |
| saquinavir (SQV/r)    |                | 0     | 1     | Green | Susceptible    |
| tipranavir (TPV/r)    |                | 0     | 1     | Green | Susceptible    |

**Integrase Inhibitors (INI)**

| Drug               | Mutations list | Score | Range | Color  | Interpretation                 |
|--------------------|----------------|-------|-------|--------|--------------------------------|
| dolutegravir (DTG) | E92Q           | 10    | 2     | Yellow | Potential low-level resistance |
| etravirine (EVG)   | E92Q           | 60    | 5     | Red    | High-level resistance          |
| raltegravir (RAL)  | E92Q           | 30    | 4     | Orange | Intermediate resistance        |

Drug resistance algorithm: STANFORD (8.2)

**Supplemental Figure 1:** Clinical HIV drug resistance reports generated via next generation sequencing performed at the NIH clinical center on plasma and lymph node extracted RNA collected prior ART initiation (A and B, respectively), CSF during relapsed PML-IRIS at 54w of ART (C), and post-IRIS rebound viremia at of 104w of ART (D). Drug resistance mutations were identified with the Stanford University's HIV Drug Resistance Database (See Methods).
