# Supplementary material
Source: PubMed Central journal article supplement (PMC10494392)
Supplement: NIHMS1920027-supplement-Supp_Fig_2.pdf [file NIHMS1920027-supplement-Supp_Fig_2.pdf]

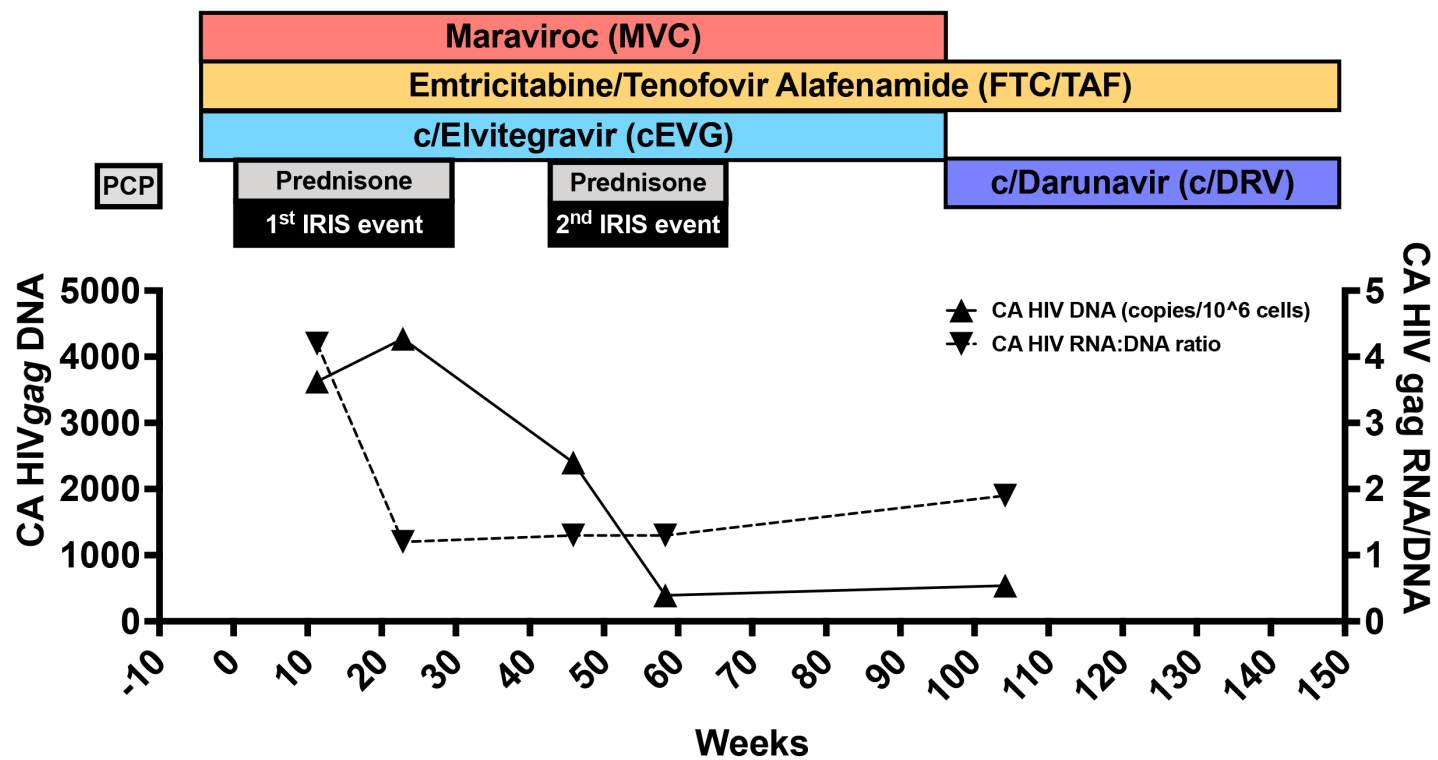

**Supplemental Figure 2:** Total CA-HIV-DNA (solid line) and HIV RNA/DNA ratios (checked line) in PBMC on ART.
