# Supplementary material
Source: PubMed Central journal article supplement (PMC10494392)
Supplement: NIHMS1920027-supplement-Supp_Fig_3.pdf [file NIHMS1920027-supplement-Supp_Fig_3.pdf]

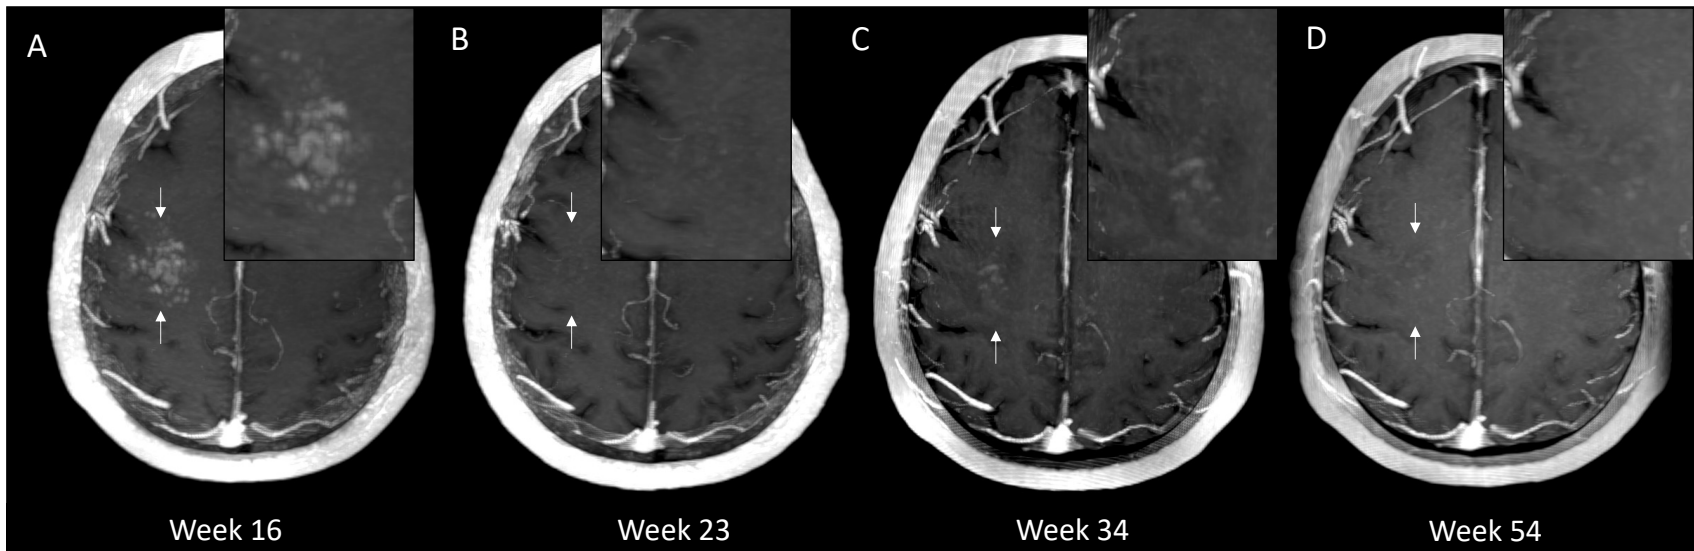

**Supplemental Figure 3:** Brain MRI post-contrast T1-weighted images show multiple foci of punctate enhancement in the right centrum semiovale (white arrows) at week 16 post-ART (A). Almost complete resolution of the enhancing lesions is seen at week 23 (B), with reappearance of some of the abnormal enhancing foci at week 34 (C). At week 54, only subtle residual punctate enhancing lesions are still seen (D). Inserts are magnified views of the regions of interest indicated by the arrows.
