# Supplementary material
Source: PubMed Central journal article supplement (PMC10494392)
Supplement: NIHMS1920027-supplement-Supp_Fig_4.pdf [file NIHMS1920027-supplement-Supp_Fig_4.pdf]

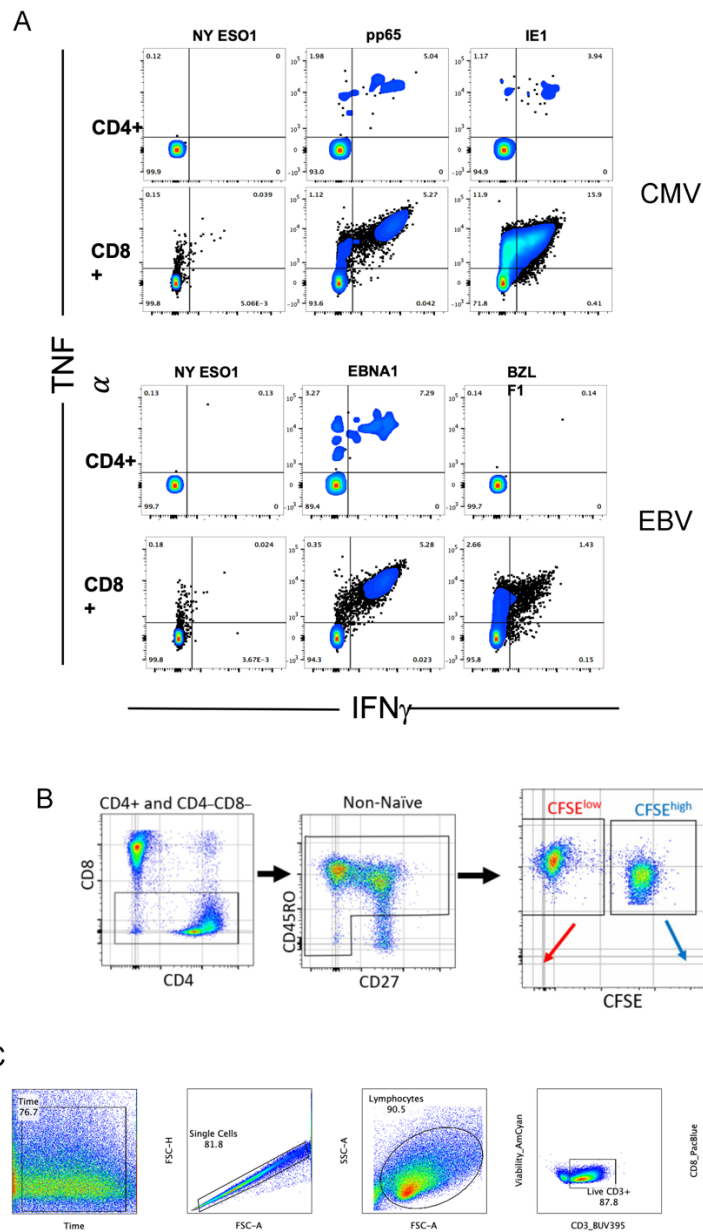

**Supplemental Figure 4.** CD4<sup>+</sup> and CD8<sup>+</sup> T-cell responses against EBV and CMV (A) antigens and gating strategies to determine (A) JCV responsive CD4 cell subsets and (B) HIV reservoirs by HIV Flow. (A) Irrelevant peptide NY-ESO1 (New York Esophageal-Squamous-cell-carcinoma-1): negative control; CMV [pp65, Immediate-early-1 (IE1)] and EBV [Epstein-Barr nuclear antigen (EBNA), BamHI-Z-fragment leftward open reading frame-1 (BZLF1)]. (B) Lymphocytes were identified based on light scatter properties, singlets were selected based on forward scatter-area vs. height, and viability based on dye exclusion. CD4 and CD8 subsets were identified among total CD3<sup>+</sup> T cells PBMC stimulated with JCV peptide pools as described in the Methods section. Non-Naïve CD4<sup>+</sup>T-cells were identified by extracellular staining and sorted into CFSE<sup>high</sup>/CFSE<sup>low</sup> subsets. (C) Sorted CFSE<sup>high/low</sup> non-naïve CD4<sup>+</sup>T-cells, were resuspended in culture media, stimulated with the Dynabeads for 42 hours and then stained for CD4, CD3, p24 KC67-PE, and p24 28B7.
