# Supplementary material
Source: PubMed Central journal article supplement (PMC10494392)
Supplement: NIHMS1920027-supplement-Supp_Fig_5.pdf [file NIHMS1920027-supplement-Supp_Fig_5.pdf]

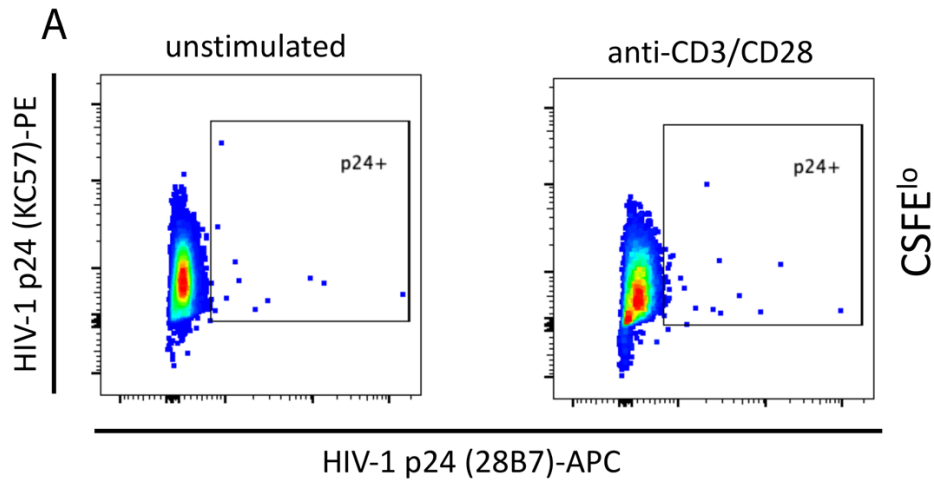

**B**

| Cells                       | CFSE <sup>lo</sup> |                |
|-----------------------------|--------------------|----------------|
|                             | Unstimulated       | anti- CD3/CD28 |
| CD3+                        | 64114              | 21865          |
| p24+                        | 16                 | 37             |
| p24+ / 10 <sup>6</sup> CD3+ | 250                | 1692           |

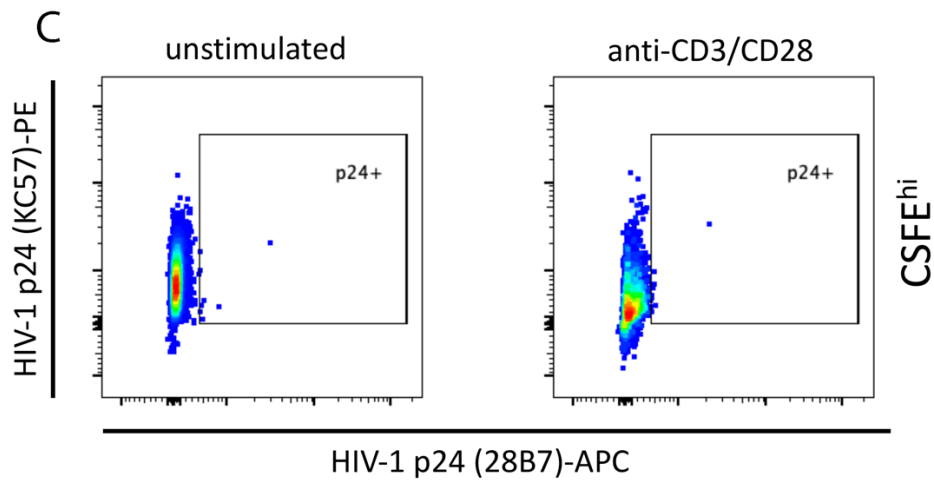

**D**

| Cells                       | CFSE <sup>hi</sup> |                |
|-----------------------------|--------------------|----------------|
|                             | Unstimulated       | anti- CD3/CD28 |
| CD3+                        | 38050              | 6836           |
| p24+                        | 10                 | 16             |
| p24+ / 10 <sup>6</sup> CD3+ | 263                | 2341           |

**Supplementary Figure 5.** HIV-Flow performed with CFSE labelled JCV-specific non-naïve CD4<sup>+</sup> T-cells derived from PBMCs collected after 46 weeks of ART. FACS plots (A and C) and p24-gag double positive cells per 10<sup>6</sup> CD4<sup>+</sup>T-cells for CFSE<sup>low</sup> and CFSE<sup>high</sup> cells (B and D) are shown. p24-gag double positive cells were detected with the antibodies KC57 and 28B7.
