# Supplementary material
Source: PubMed Central journal article supplement (PMC10494392)
Supplement: NIHMS1920027-supplement-Supp_Fig_6.pdf [file NIHMS1920027-supplement-Supp_Fig_6.pdf]

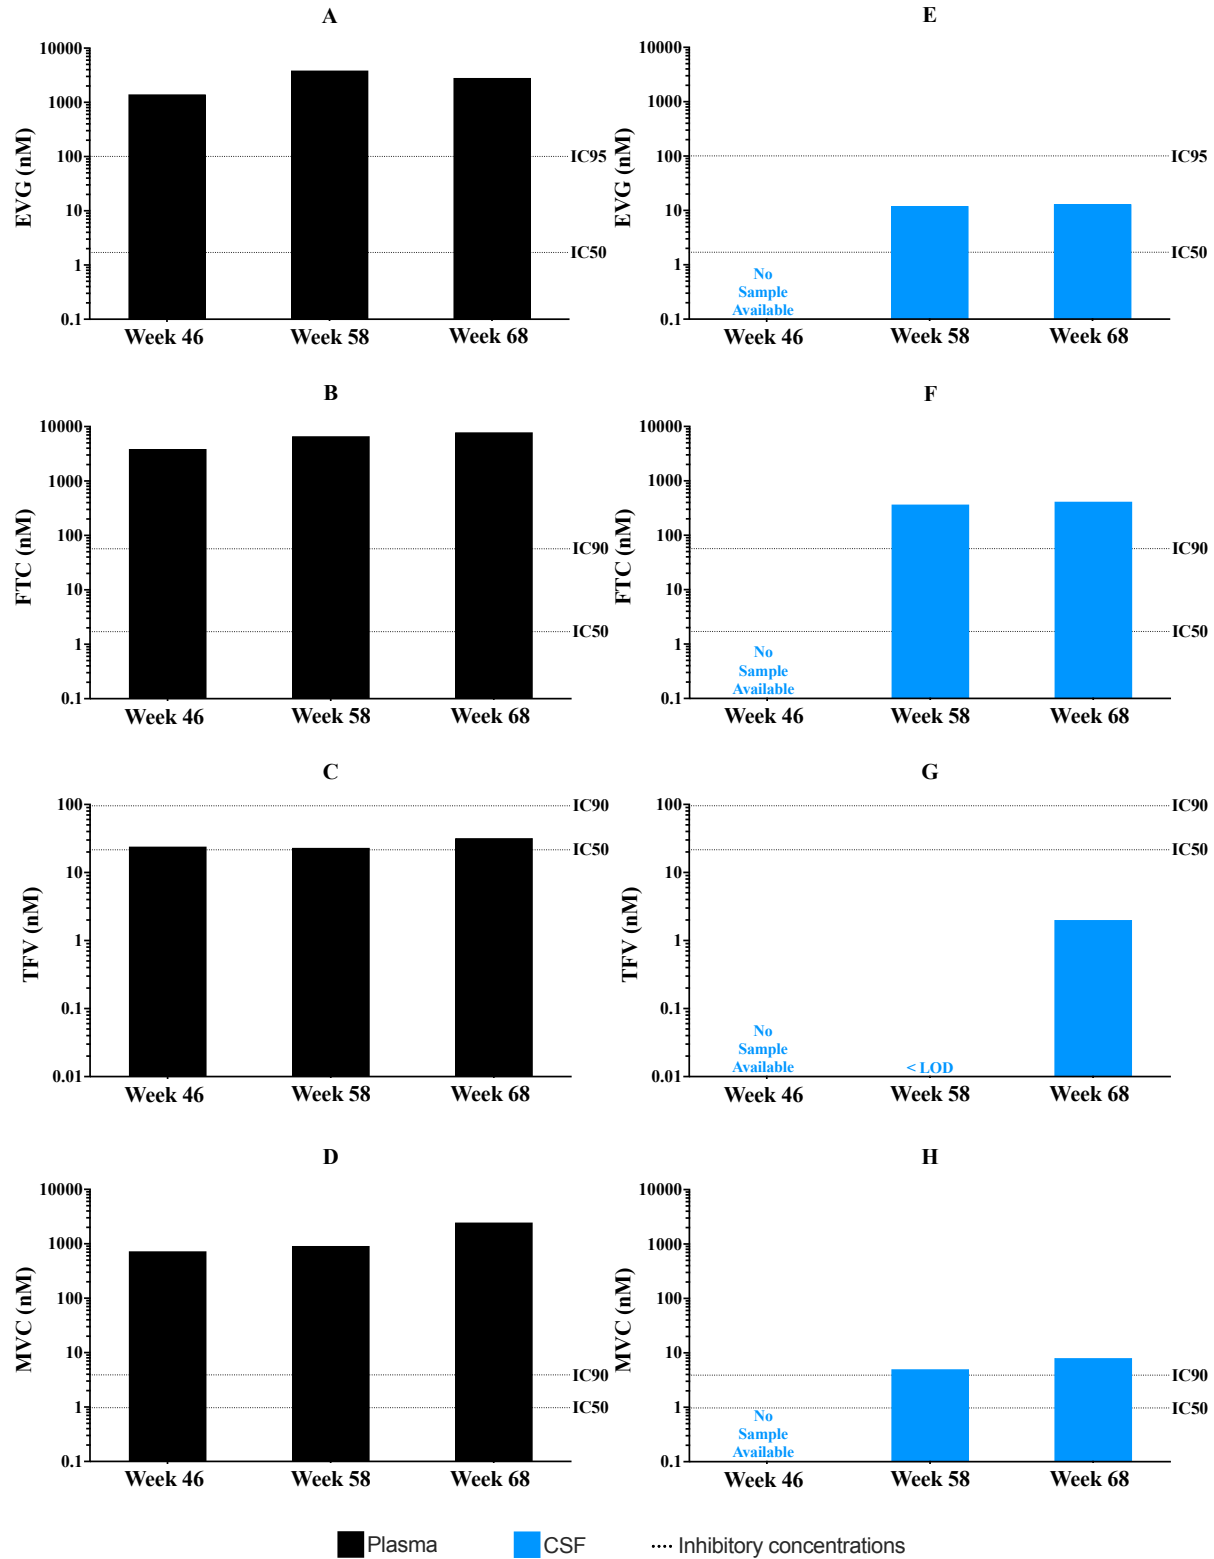

**Supplemental Figure 6.** ARV levels measured in plasma (A, B, C, D) and CSF (E, F, G, H), before, during and after relapsed PML-IRIS (46, 58 and 68 weeks after ART initiation, respectively). Broken grey lines indicate the inhibitory concentrations (IC50/IC90/IC95) to suppress HIV-1 replication.
