# Supplementary material
Source: PubMed Central journal article supplement (PMC10494392)
Supplement: NIHMS1920027-supplement-Supp_Fig_7.pdf [file NIHMS1920027-supplement-Supp_Fig_7.pdf]

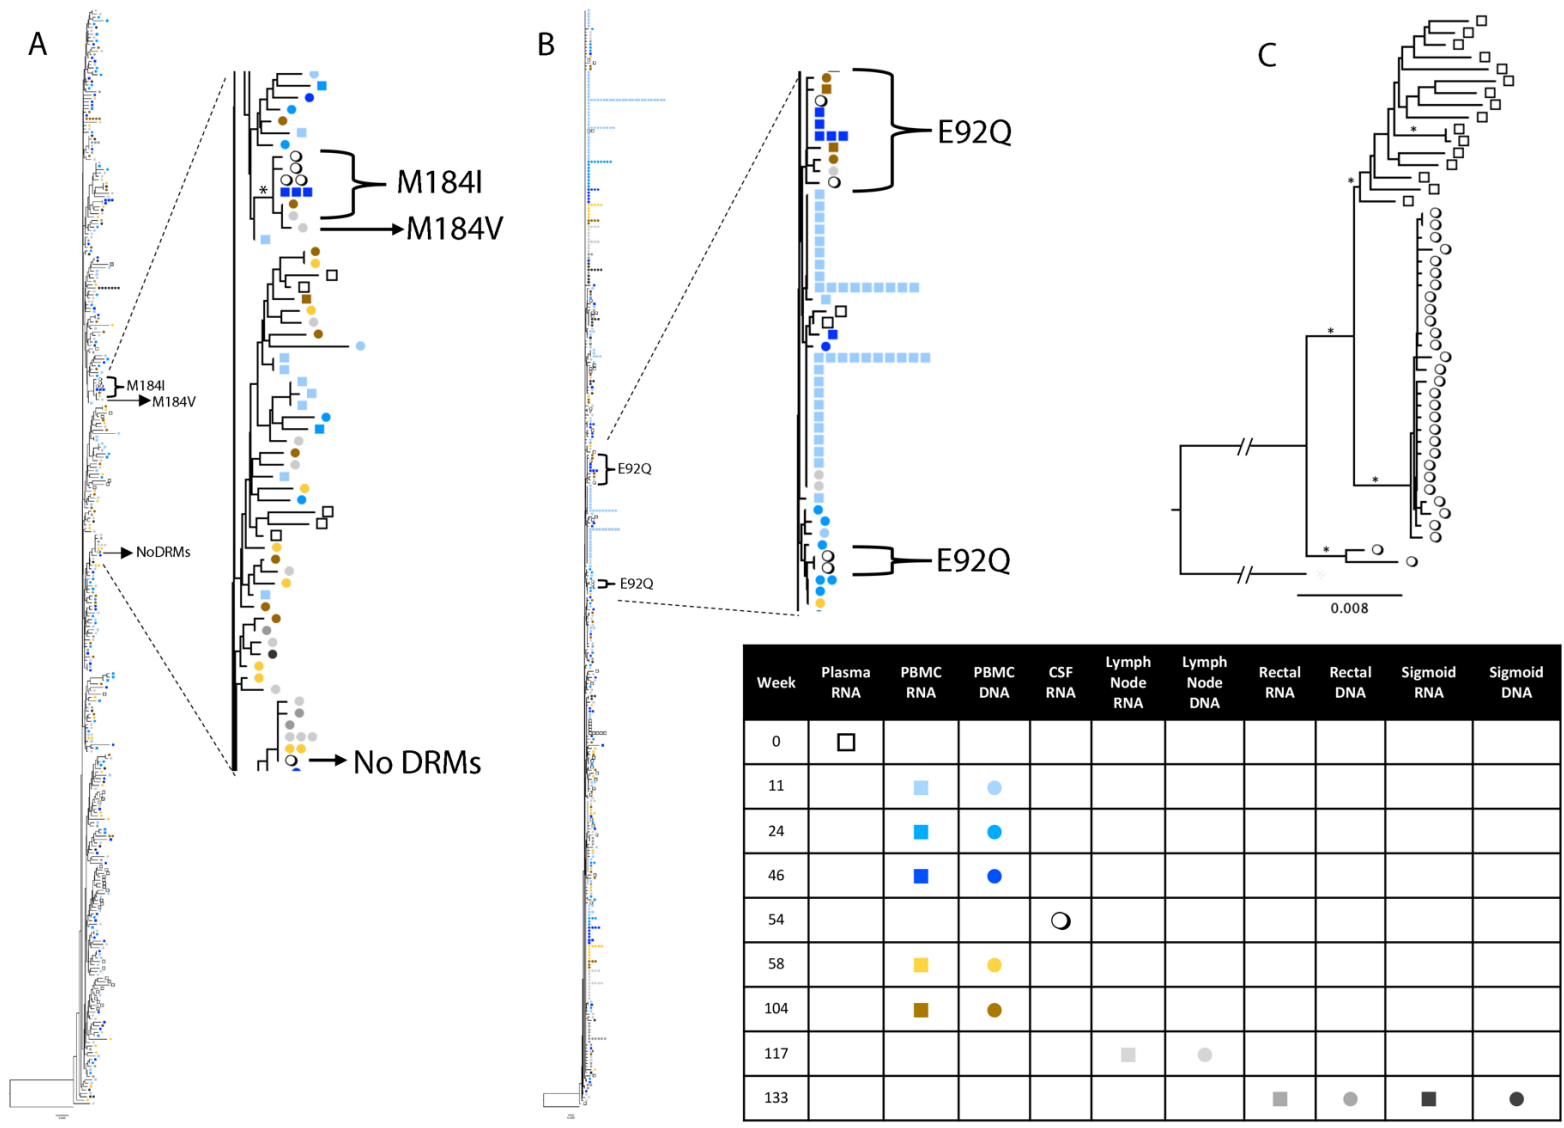

**Supplemental Figure 7.** Neighbor Joining (NJ) trees of (A) HIV protease-reverse transcriptase (*pro*-RT) and (B) integrase (IN) (C) *env* single genome sequences. Sequences with HIV drug resistance mutations (DRMs) are marked. \*Bootstrap values >75 in *pro*-RT/IN NJ-trees, >95 in *env* NJ-tree.
