# Supplementary material
Source: PubMed Central journal article supplement (PMC10494392)
Supplement: NIHMS1920027-supplement-Supp_Table_1.pdf [file NIHMS1920027-supplement-Supp_Table_1.pdf]

A

| Weeks of ART | Sample     |      | # Sequences (Unique) | APD ( <i>pro</i> -RT) | Drug Resistance Mutations |      | Population Shifts                   |
|--------------|------------|------|----------------------|-----------------------|---------------------------|------|-------------------------------------|
|              | Source     | Type |                      |                       | <i>pro</i> -RT            | (%)  |                                     |
| 0            | Plasma     | RNA  | 34                   | 0.8                   | NONE                      | NONE | Reference                           |
| 11           | PBMC       | DNA  | 19                   | 0.9                   | NONE                      | NONE | No                                  |
|              |            | RNA  | 20                   | 0.7                   | NONE                      | NONE | No                                  |
| 24           | PBMC       | DNA  | 32                   | 0.7                   | NONE                      | NONE | Yes                                 |
|              |            | RNA  | 17                   | 1.1                   | NONE                      | NONE | No                                  |
| 46           | PBMC       | DNA  | 27                   | 0.8                   | NONE                      | NONE | Yes                                 |
|              |            | RNA  | 13                   | 0.8                   | M184I                     | E92Q | No                                  |
| 54           | PBMC       | DNA  | 27                   | 0.9                   | NONE                      | NONE | Yes                                 |
| 54           | CSF        | RNA  | 5                    | -                     | M184I                     | E92Q | Insufficient sequences for analyses |
| 104          | PBMC       | DNA  | 24                   | 0.8                   | M184I                     | E92Q | Yes                                 |
| 117          | Lymph node | DNA  | 61                   | 0.8                   | M184I, M184V              | E92Q | Yes                                 |
| 133          | Rectum     | DNA  | 22                   | 0.6                   | NONE                      | NONE | Yes                                 |
| 133          | Sigmoid    | DNA  | 21                   | 0.8                   | NONE                      | NONE | Yes                                 |

B

| HIV-1 PCR target                                 | Primer name     | Primer's designation                             | Primer sequence 5' → 3'        |
|--------------------------------------------------|-----------------|--------------------------------------------------|--------------------------------|
| Protease-Reverse Transcriptase ( <i>pro</i> -RT) | 3500-1849+      | Reverse transcription, 1 <sup>st</sup> round PCR | GATGACAGCATGTCAGGGAG           |
|                                                  | 1870+3410-      | 1 <sup>st</sup> round PCR                        | CTATTAAGTATTTTGGTGGGCATAA      |
|                                                  | 1870+3410-      | 2 <sup>nd</sup> Round PCR, sequencing            | CACTTAGTGGTATTACTTCTGTTAGTGCTT |
|                                                  | 2030+3410-      | 2 <sup>nd</sup> Round PCR, sequencing            | GAGTTTGGCTGAGGCAAT             |
|                                                  | 2030+2600+      | Sequencing                                       | TGTTGGAAATGTGGAAAGGAAGGAC      |
|                                                  | 2600+2610-      | Sequencing                                       | ATGGCCAAAAGTTAAACAATGGC        |
|                                                  | 2610-3330-      | Sequencing                                       | TTCTTCTGTCAATGGCCATTGTTTAAAC   |
|                                                  | 3330-           | Sequencing                                       | TGCCCCAATTCAATTTTCCACTAA       |
| Integrase (IN)                                   | INREV-I         | Reverse transcription, 1 <sup>st</sup> round PCR | TCTCCTGTATGCAGACCCCAATAT       |
|                                                  | HIV+4141        | 1 <sup>st</sup> round PCR                        | TCTACCTGGCATGGGTACCA           |
|                                                  | POLK-           | 2 <sup>nd</sup> Round PCR, sequencing            | CCTTGACTTTGGGGATTGTAGGGAA      |
|                                                  | POLZ            | 2 <sup>nd</sup> Round PCR, sequencing            | AATTTTCGGGTTTATTACAG           |
|                                                  | INREV-II        | Sequencing                                       | CCTAGTGGGATGTGTACTTCTGA        |
| Envelope ( <i>env</i> )                          | Random hexamers | Reverse transcription                            | Invitrogen™; Cat# N8080127     |
|                                                  | envB5out        | 1 <sup>st</sup> round PCR                        | TAGAGCCCTGGAAGCATCCAGGAAG      |
|                                                  | envB3out        | 1 <sup>st</sup> round PCR                        | TTGCTACTTGTGATTGCTCCATGT       |
|                                                  | envB5in         | 2 <sup>nd</sup> Round PCR, sequencing            | TTAGGCATCTCCTATGGCAGGAAGAAG    |
|                                                  | envB3in         | 2 <sup>nd</sup> Round PCR, sequencing            | GTCTCGAGATACTGCTCCCACCC        |
|                                                  | For14           | Sequencing                                       | TATGGGACCAAAGCCTAAAGCCATGTG    |
|                                                  | For16           | Sequencing                                       | TTTAATTGTGGAGGAGAATTTTCTA      |
|                                                  | For18           | Sequencing                                       | CATATCAAATTGGCTGTGGTATAT       |
|                                                  | Rev15           | Sequencing                                       | CTGCCATTTAACAGCAGTTGAGTTGA     |
|                                                  | Rev16           | Sequencing                                       | ATGGGAGGGGCATACATTGCT          |
| Rev18                                            | Sequencing      | GGTGAGTATCCCTGCCTAACTCTAT                        |                                |

**Supplemental Table 1.** (A) Summary of drug resistance and population genetics analyses of *pro*-RT populations, and (B) nucleotide primers used to generate HIV-1 *pro*-RT, *IN* and *env*.
