# Supplementary material
Source: PubMed Central journal article supplement (PMC10494392)
Supplement: NIHMS1920027-supplement-Supp_Table_3.pdf [file NIHMS1920027-supplement-Supp_Table_3.pdf]

| Codon position<br>(HXB2 numbering) | Amino Acid Frequency               |                                 |                        | Env sites and domains      |                    | Fisher`s-exact<br><i>p</i> -value |
|------------------------------------|------------------------------------|---------------------------------|------------------------|----------------------------|--------------------|-----------------------------------|
|                                    | HXB2_K0345.1<br>(Reference strain) | Plasma<br>(n=16 SGS)            | CSF<br>(n=30 SGS)      | gp120                      | gp41               |                                   |
| 62                                 | D                                  | E (6%), K (94%)                 | E (97%), K (3%)        | CD4bs                      | -                  | 4.85E-10                          |
| 136 “NI” insertion                 | -                                  | NI insertion (6%)               | NI insertion (100%)    | V1, N-linked glycosylation | -                  | 3.10E-11                          |
| 187                                | D                                  | E (6%), N (12%), D (82%)        | E (93%), D (7%)        | V2                         | -                  | 4.80E-07                          |
| 252                                | R                                  | K (19%), R (81%)                | K (90%), R (10%)       | C2                         | -                  | 2.30E-06                          |
| 319                                | T                                  | A (100%)                        | A (7%), T (93%)        | V3                         | -                  | 1.50E-10                          |
| 322                                | K                                  | A (6%), E (94%)                 | A (100%)               | V3                         | -                  | 3.10E-11                          |
| 343                                | L                                  | I (56%), L (44%)                | I (7%), L (93%)        | C3                         | -                  | 4.00E-04                          |
| 345                                | Q                                  | R (100%)                        | R (7%), Q (93%)        | C3                         | -                  | 1.50E-10                          |
| 347                                | A                                  | V (12%), A (88%)                | V (93%), A (7%)        | C3                         | -                  | 5.30E-08                          |
| 399                                | S                                  | N (100%)                        | N (7%), T (93%)        | V4, N-linked glycosylation | -                  | 1.50E-10                          |
| 420                                | R                                  | K (6%), R (94%)                 | K (94%), R (6%)        | V4                         | -                  | 4.00E-09                          |
| 449                                | N                                  | Y (50%), N (50%)                | N (100%)               | C4                         | -                  | 5.00E-05                          |
| 462                                | S                                  | G (69%), R (6%), deletion (25%) | G (7%), deletion (93%) | V5                         | -                  | 1.90E-05                          |
| 464 “QXXT” insertion               | -                                  | K (31.5%), N (37%), T (31.5%)   | N (7%), K (93%)        | C5                         | -                  | 1.90E-05                          |
| 782                                | I                                  | I (25%), V (75%)                | I (93%), V (7%)        | -                          | cytoplasmic domain | 3.40E-06                          |

**Supplemental Table 3.** Frequencies of plasma/CSF compartmentalizing amino acids in HIV-1 *env* single genomes. We used two-sided Fisher`s-exact tests to compare amino acid frequency of dominant alleles in CSF, compared to those detected in plasma at week 54, during PML-IRIS; *p*-values shown.
